# Supplementary material for: Schooling shapes the brain: neural specialization for words and numbers in early childhood.
Source: Research Square preprint supplement (doi:10.21203/rs.3.rs-8839009/v1), 2026-02-13
Supplement: Supplementary file 1 [file 5138e8a419fda0240fe82651.docx]

Supplementary materials

*Supplementary Table 1 Condition-specific parameter estimates (β) from each ROI for the contrasts where the schooling group exhibited more positive activation than the non-schooling group.*

| **Contrast** | **Area of activation** | **Mean beta (NS)** | **Mean beta (S)** |
| --- | --- | --- | --- |
| **Words -**  **Fixation** | Left supplementary motor area | -0.13 | 0.16 |
| Left fusiform gyrus | 0.06 | 0.53 |
| Left middle frontal cortex | -0.16 | 0.04 |
| **Numbers – Fixation** | Right inferior parietal cortex | -0.37 | 0.08 |
| Left superior frontal cortex | -0.24 | 0.13 |
| Left insula | -0.40 | -0.13 |
| **Words -**  **Numbers** | Left fusiform gyrus | -0.18 | 0.23 |
| **Numbers -**  **Words** | Right cuneus/ superior occipital/ calcarine cortex | -0.20 | 0.34 |
| Right supramarginal gyrus | -0.08 | 0.09 |
| Left middle cingulate cortex | -0.07 | 0.03 |
| Right superior frontal cortex | -0.20 | 0.21 |
| Left cuneus/occipital cortex | -0.22 | 0.06 |
| Left superior/middle frontal cortex | -0.07 | 0.19 |

*Note. NS = non-schooling group; S = schooling group. Positive beta values indicate activation, while negative beta values indicate deactivation relative to baseline.*

*Supplementary Table 2 Condition-specific parameter estimates (β) from each ROI for the contrasts where the non-schooling group exhibited more positive activation than the schooling group.*

| **Contrast** | **Area of activation** | **Mean beta (NS)** | **Mean beta (S)** |
| --- | --- | --- | --- |
| **Words – Fixation** | Right cuneus/ superior occipital/ calcarine cortex | 0.74 | 0.43 |
| **Numbers – Fixation** | *No significant clusters* | / | / |
| **Words - Numbers** | Right cuneus/ superior occipital/ calcarine cortex | 0.20 | -0.34 |
| Right supramarginal gyrus | 0.08 | -0.09 |
| Left middle cingulate cortex | 0.07 | -0.03 |
| Right superior frontal cortex | 0.20 | -0.21 |
| Left cuneus/occipital cortex | 0.22 | -0.06 |
| Left superior/middle frontal cortex | 0.07 | -0.19 |
| **Numbers - Words** | Left fusiform gyrus | 0.18 | -0.23 |
| Right postcentral cortex | -0.02 | -0.10 |

*Note. NS = non-schooling group; S = schooling group. Positive beta values indicate activation, while negative beta values indicate deactivation relative to baseline.*
